# Supplementary material for: Health-Related Quality of Life among Older Adults with Dementia Living in Vietnamese Nursing Homes
Source: Preprints.org preprint supplement (doi:10.20944/preprints202312.0430.v1), 2023-12-06
Supplement: Supplementary file 1 [file supplementary]

**Supplementary Materials**

# Sampling frame of nursing home facilities in Hanoi, Vietnam

Sampling: Cluster sampling

Target population: older adults with dementia living in nursing homes in Hanoi, Vietnam.

Source population: older adults living in private nursing homes were listed in the Report Market outlook 2021 in Hanoi [26].

Sampling frame: 11 private nursing home systems were licensed to operate at the time of the study in 2022.

# Table S1. Sampling frame of nursing home facilities in Hanoi, Vietnam

| N | Facilities | Size |
| --- | --- | --- |
| 1 | Dien Hong Nursing Center (4 campuses) * | L |
| 2 | Bach Nien Thien Duc Aged Care Center (3 campuses) | L |
| 3 | Lotus Aged Care Center | M |
| 4 | Nhan Ai Aged Care Center * | M |
| 5 | Tuyet Thai Aged Care Center | M |
| 6 | Ha Noi Nursing Center (2 campuses) | M |
| 7 | Javilink Nursing Home System (2 campuses) | S |
| 8 | KAIGO Nursing Center (2 campuses) | S |
| 9 | ALH Nursing Home | S |
| 10 | OriHome Aged Care Center * | S |
| 11 | FDC Elder Nursing Home | S |

*Information is referenced from the* *Report Market outlook for aged care services in Vietnam3, through the website and directly calling the facilities.*

** Selected facilities with updated nursing numbers up to December 2022; S (small cluster): facility with less than 50 residents; M (medium cluster): facility with 50 to 100 residents; L (large cluster): facility with more than 100 residents.*
